# Supplementary material for: SARS-CoV-2-Specific CD8+ T-Cells in Blood but Not in the Lungs of Vaccinated K18-hACE2 Mice after Infection
Source: MDPI journal article supplement (doi:10.3390/vaccines11091433), 2023-08-30
Supplement: s1 [file s1]

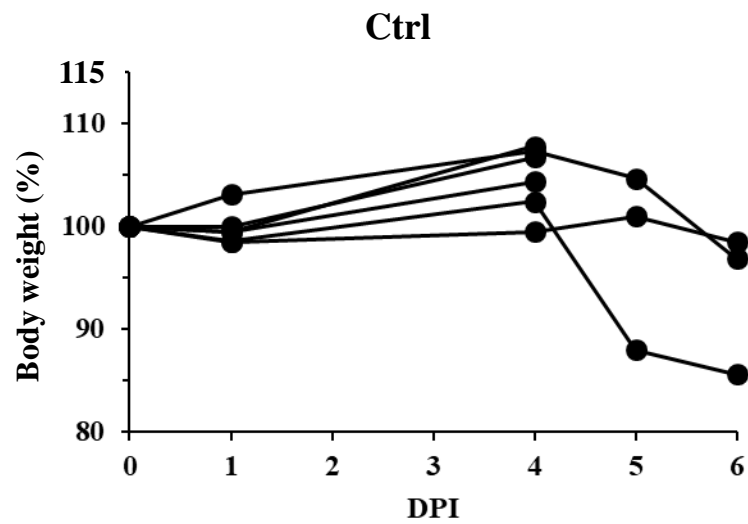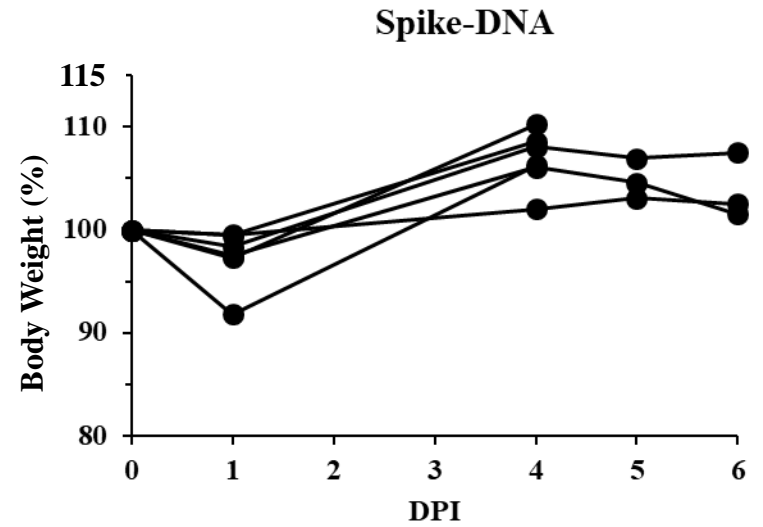

**Supplementary Figure S1.** Relative weight loss in mice infected by SARS-CoV-2 three weeks after vaccine booster. DPI: days post-infection.

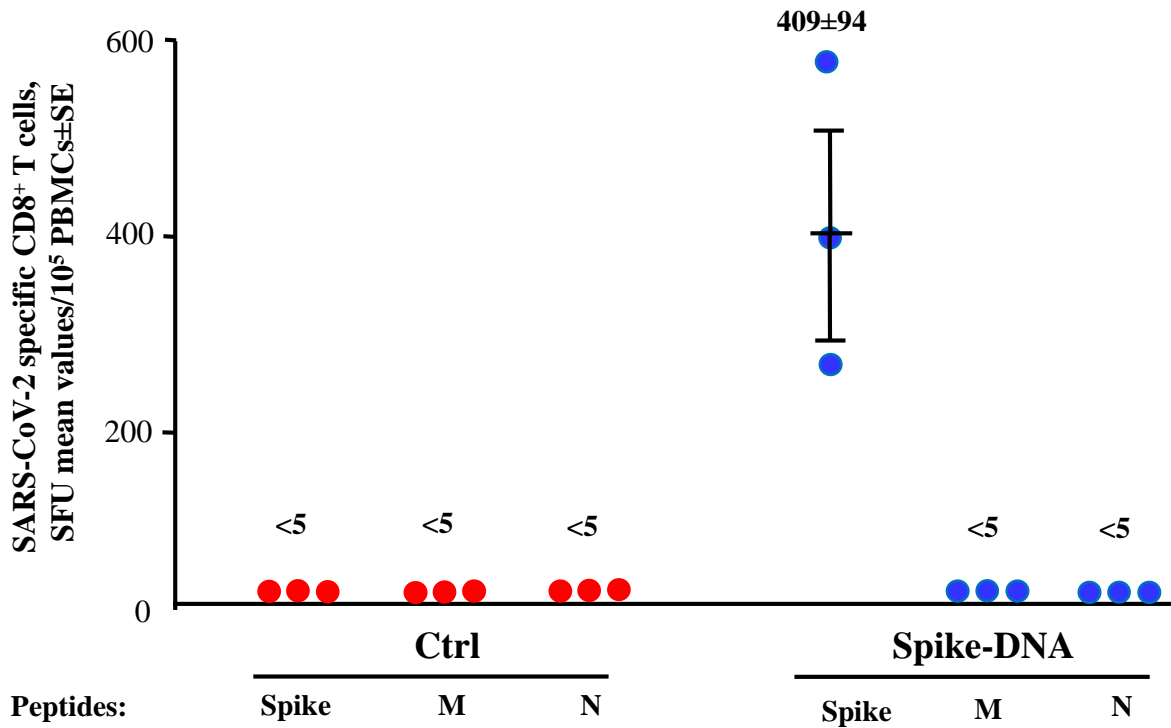

**Supplementary Figure S2.** Detection of Spike-, M-, and N-specific CD8<sup>+</sup> T cells in PBMCs isolated 4 days after infection. A total of 10<sup>5</sup> PBMCs were incubated overnight with or without 5 µg/ml of either unrelated, Spike-, M-, or N-specific peptides in IFN-γ EliSpot microwells. Shown are the numbers of SFUs/well calculated as mean values of triplicates after subtraction of the mean SFUs calculated in wells of PBMCs treated with unspecific peptides (<5 for each cell culture tested). Reported is intragroup mean value ± SE.

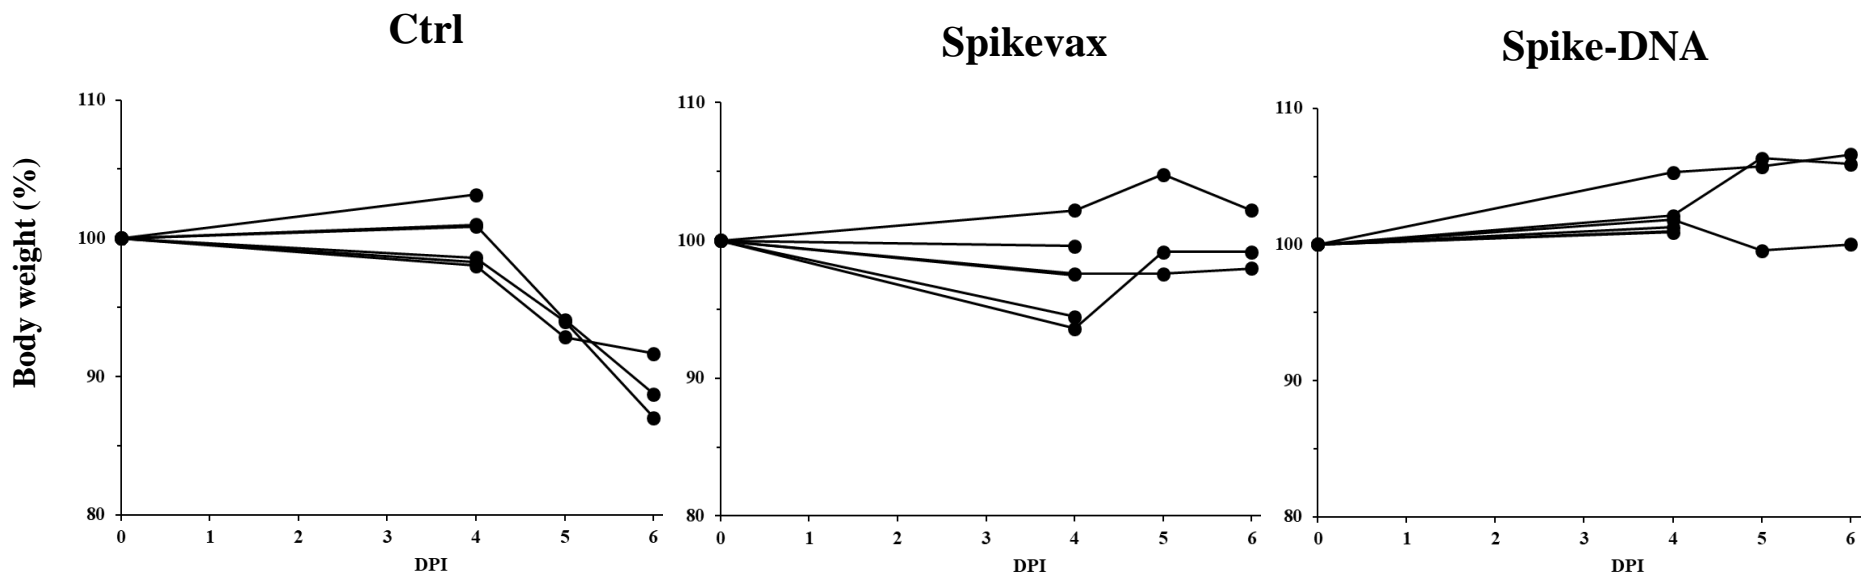

**Supplementary Figure S3.** Relative weight loss in mice infected by SARS-CoV-2 three months after vaccine booster. DPI: days post-infection.

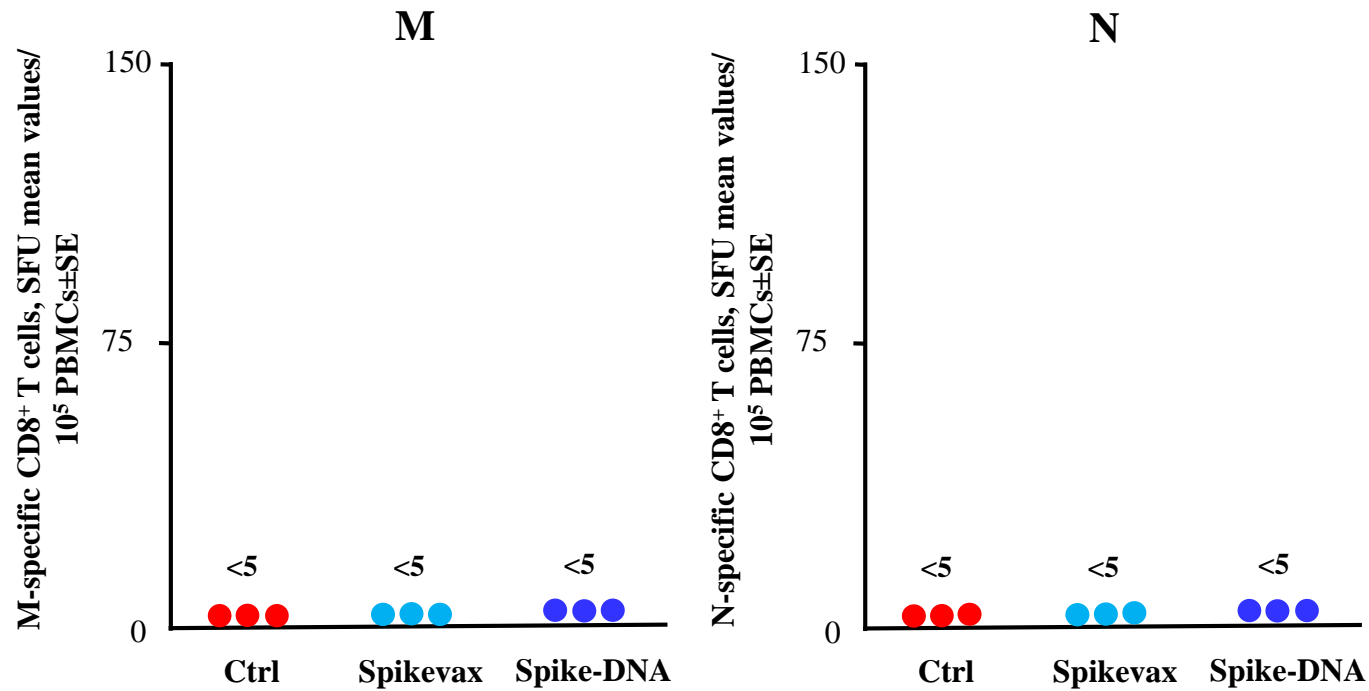

**Supplementary Figure S4.** Detection of both M- and N-specific circulatory CD8<sup>+</sup> T cells in K18-huACE2 mice three months after vaccine boosting and 4 days after infection. Shown are the results from IFN-γ ELISpot analysis carried out in 10<sup>5</sup> PBMCs incubated overnight with 5 μg/ml of either unrelated or M-specific peptide. Data were calculated as mean values of triplicates after subtraction of the mean SFUs detected in wells of PBMCs treated with an unspecific peptide (<3 for each cell culture tested).
